# Supplementary material for: Speech-generated aerosol settling times and viral viability can improve COVID-19 transmission prediction
Source: Royal Society of Chemistry journal article supplement (doi:10.1039/d1ea00013f), 2021-12-08
Supplement: d1ea00013f1.pdf [file d1ea00013f1.pdf]

1           Supplementary Information to  
2                    Speech-generated Aerosol Settling Times and Viral Viability  
3                            Predict COVID-19 Transmission Efficiency

4  
5                            Alan Y. Gu<sup>#</sup>, Yanzhe Zhu<sup>#</sup>, Jing Li and Michael R. Hoffmann\*

6  
7                                            Linde Laboratories  
8                                            California Institute of Technology  
9                                            Pasadena, California 91125, USA

10                                           #Equal contribution

11                                           \*Correspondence and requests for materials should be addressed to MRH

12                                           Tel: 626-395-4391 Email: [mrh@caltech.edu](mailto:mrh@caltech.edu)

13  
14           **This file includes:**

15           Supplementary Notes S1

16           Supplementary Table S1

17           Supplementary Figures S1 to S2

18

19                                           February 2021

20 **Supplementary Notes**

21 **Supplementary Notes 1**

22 Code for this work is available at: <https://github.com/zhuyanzhe98/evaptransmission>

23 **Supplementary Tables and Figures**

**a. R<sup>2</sup> for Fitting**

|                        | LR    | VAR   | Simple RNN | LSTM    |
|------------------------|-------|-------|------------|---------|
| Harris County, TX      | 0.362 | 0.616 | 0.374      | 0.99998 |
| King County, WA        | 0.540 | 0.702 | 0.979      | 0.99998 |
| LA County, CA          | 0.805 | 0.882 | 0.772      | 0.99997 |
| Maricopa County, AZ    | 0.530 | 0.873 | 0.712      | 0.99995 |
| Santa Clara County, CA | 0.719 | 0.721 | 0.745      | 0.99998 |

**b. Sum of Squares of Residuals for Prediction**

|                        | LR       | VAR      | Simple RNN | LSTM     |
|------------------------|----------|----------|------------|----------|
| Harris County, TX      | 2.02E-03 | 3.87E-02 | 9.54E-04   | 4.37E-03 |
| King County, WA        | 1.76E-03 | 3.85E-03 | 9.97E-04   | 1.30E-03 |
| LA County, CA          | 2.32E-02 | 8.79E-03 | 1.20E-02   | 2.47E-03 |
| Maricopa County, AZ    | 1.27E-03 | 1.56E-02 | 6.60E-04   | 4.19E-04 |
| Santa Clara County, CA | 1.02E-02 | 1.87E-02 | 9.29E-03   | 8.47E-03 |

**c. Fitting and prediction for Maricopa County, May-August**

|                                            | LR       | Simple RNN | LSTM     |
|--------------------------------------------|----------|------------|----------|
| R <sup>2</sup> for Fitting                 | 0.172    | 0.579      | 0.99996  |
| Sum of Squares of Residuals for Prediction | 1.10E-02 | 1.56E-02   | 1.60E-02 |

24

25 Table S1. (a) R-squared of model fitting and (b) sum of squares of residuals of model prediction  
 26 for each county and model during April 2020. (c) R-squared of model fitting and sum of squares  
 27 of residuals of model prediction for Maricopa County during extended time frame from May to  
 28 August 2020. LR: linear regression; VAR: vector autoregression; Simple RNN: simple recurrent  
 29 neural network; LSTM: long short term memory recurrent neural network

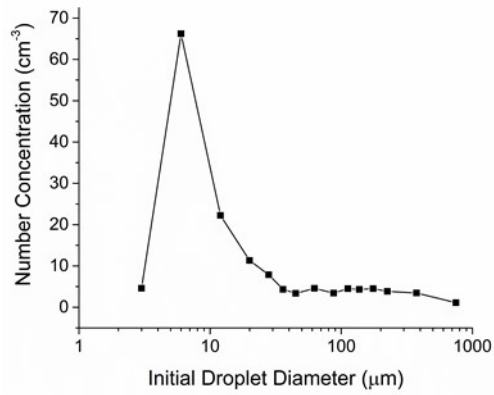

30

31 Figure S1. Size distribution of speech-generated droplets before evaporation measured by  
32 Morawska et al.<sup>31</sup> The peak number concentration is at 6 μm and is used as the input to the Köhler  
33 equation in this work.

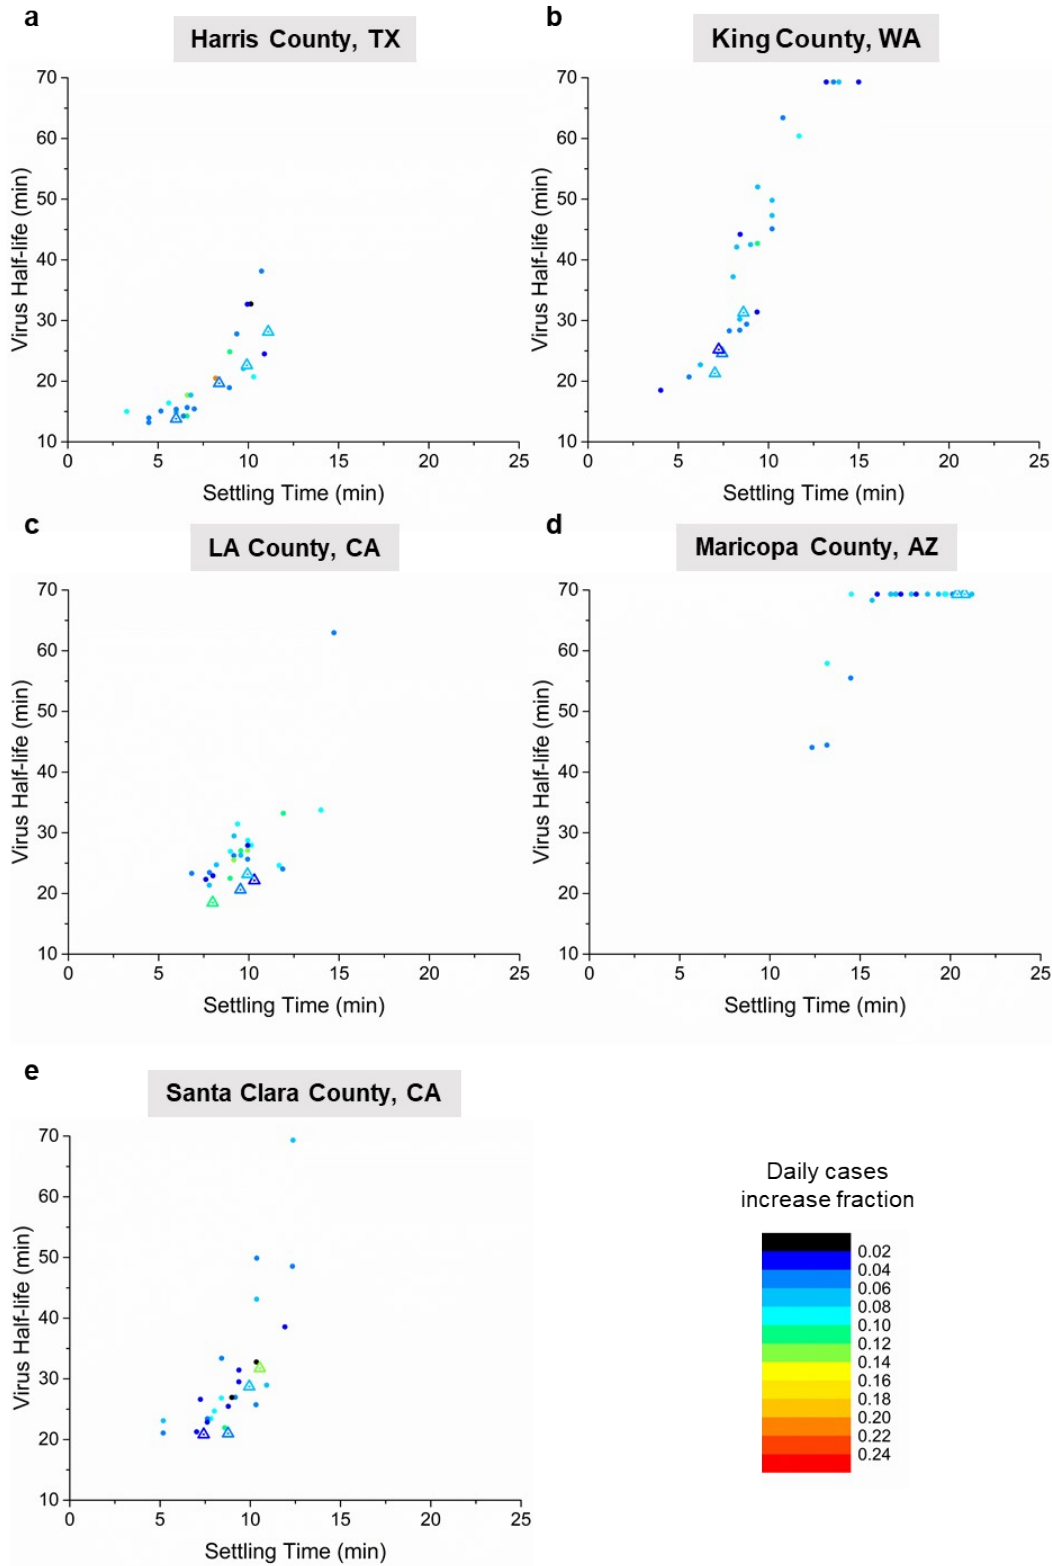

35 Figure S2. Data points available to generate the contour plot in Fig. 5 for each county, with the  
36 daily case percentage increase as a function of settling time and viral viability (represented by half-  
37 life). Colour shows the daily case percentage increase in decimal. The daily cases percentage  
38 increase is shown as the colour of each data point. The dots represent data points for training, and  
39 the triangles represent data for prediction. LR: linear regression; VAR: vector autoregression;  
40 Simple RNN: simple recurrent neural network; LSTM: long short term memory recurrent neural  
41 network
