# Supplementary material for: Speech-generated aerosol settling times and viral viability can improve COVID-19 transmission prediction
Source: Royal Society of Chemistry journal article supplement (doi:10.1039/d1ea00013f), 2021-12-08
Supplement: d1ea00013f2.pdf [file d1ea00013f2.pdf]

# Influence of Weather Conditions and Aerosol Properties on COVID-19 Contamination Rates

Environmental  
Science:  
Atmospheres

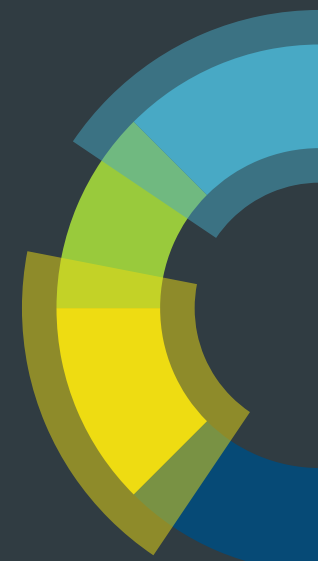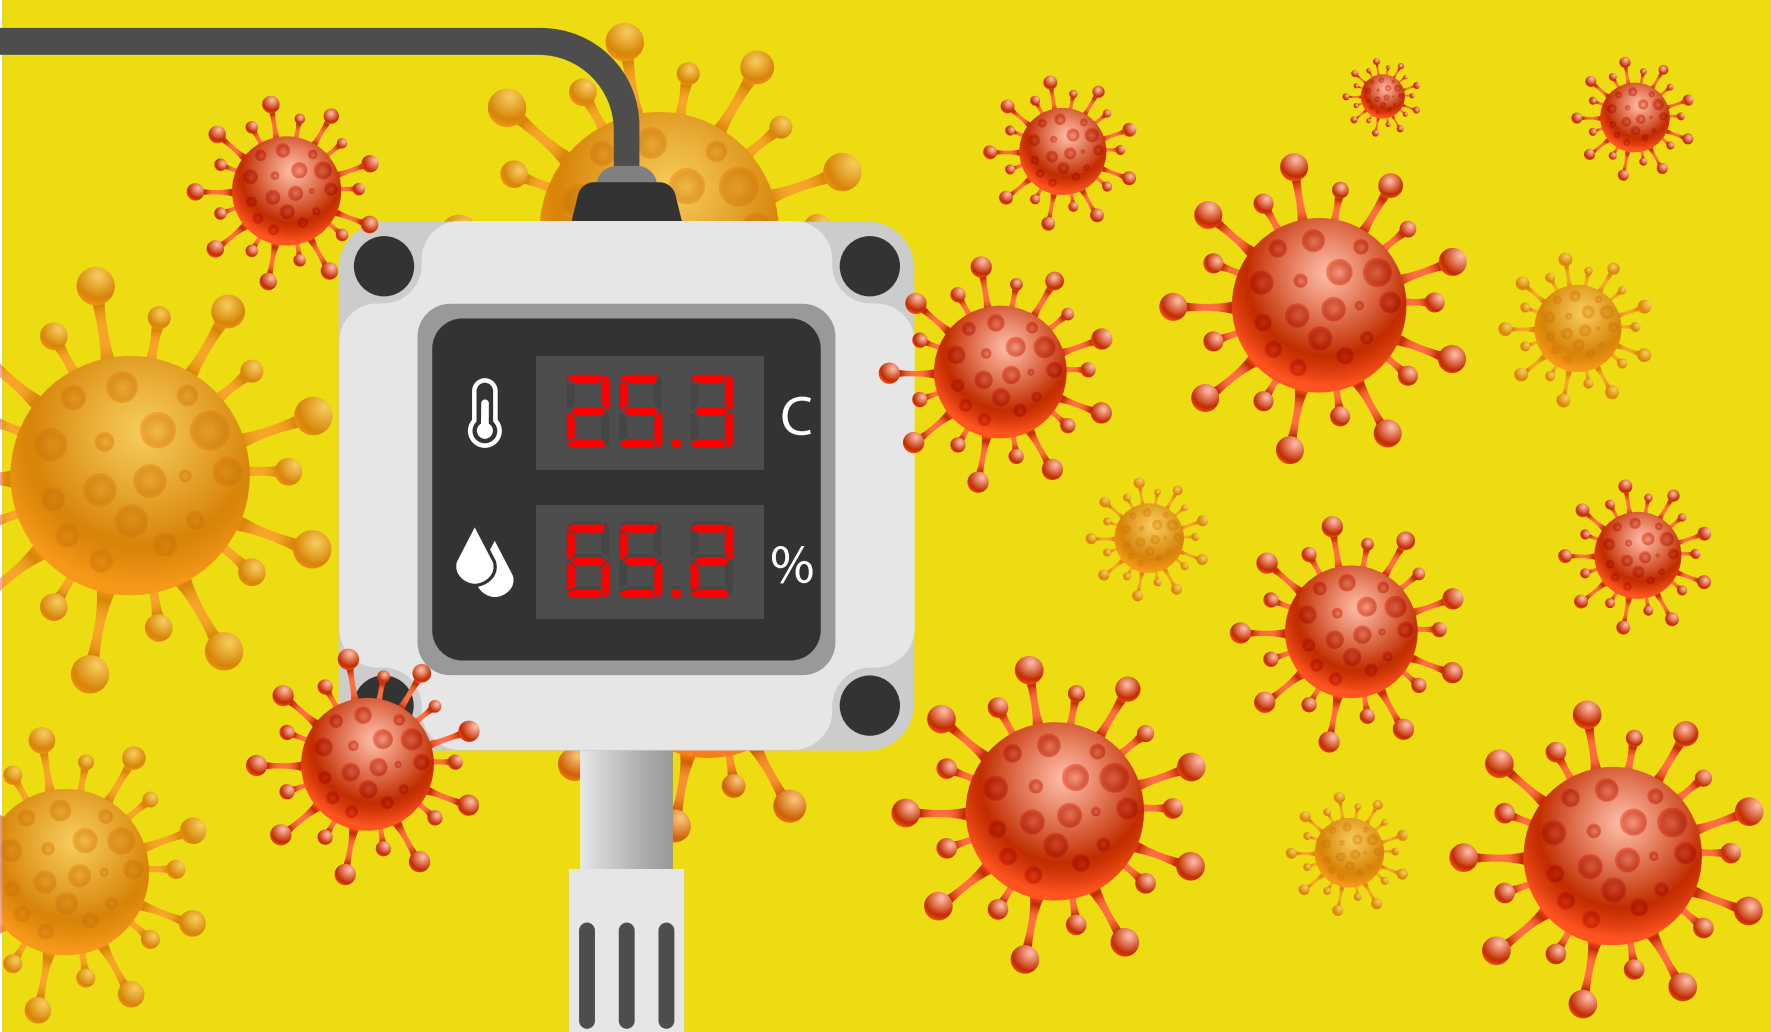

Weather conditions have been widely considered a possible contributor to SARS-CoV-2 transmission in COVID-19

However, the lack of first principles study has led to a poor understanding of weather-related transmissions

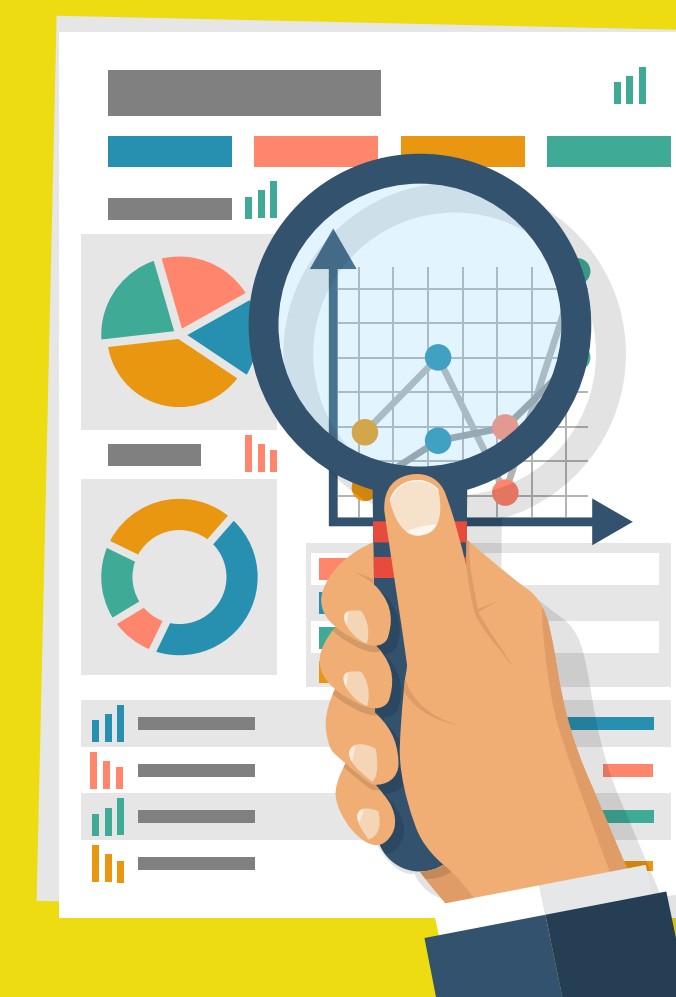

**A first-principle model for predicting SARS-CoV-2 transmission based on weather-induced changes in the properties of speech-generated aerosols**

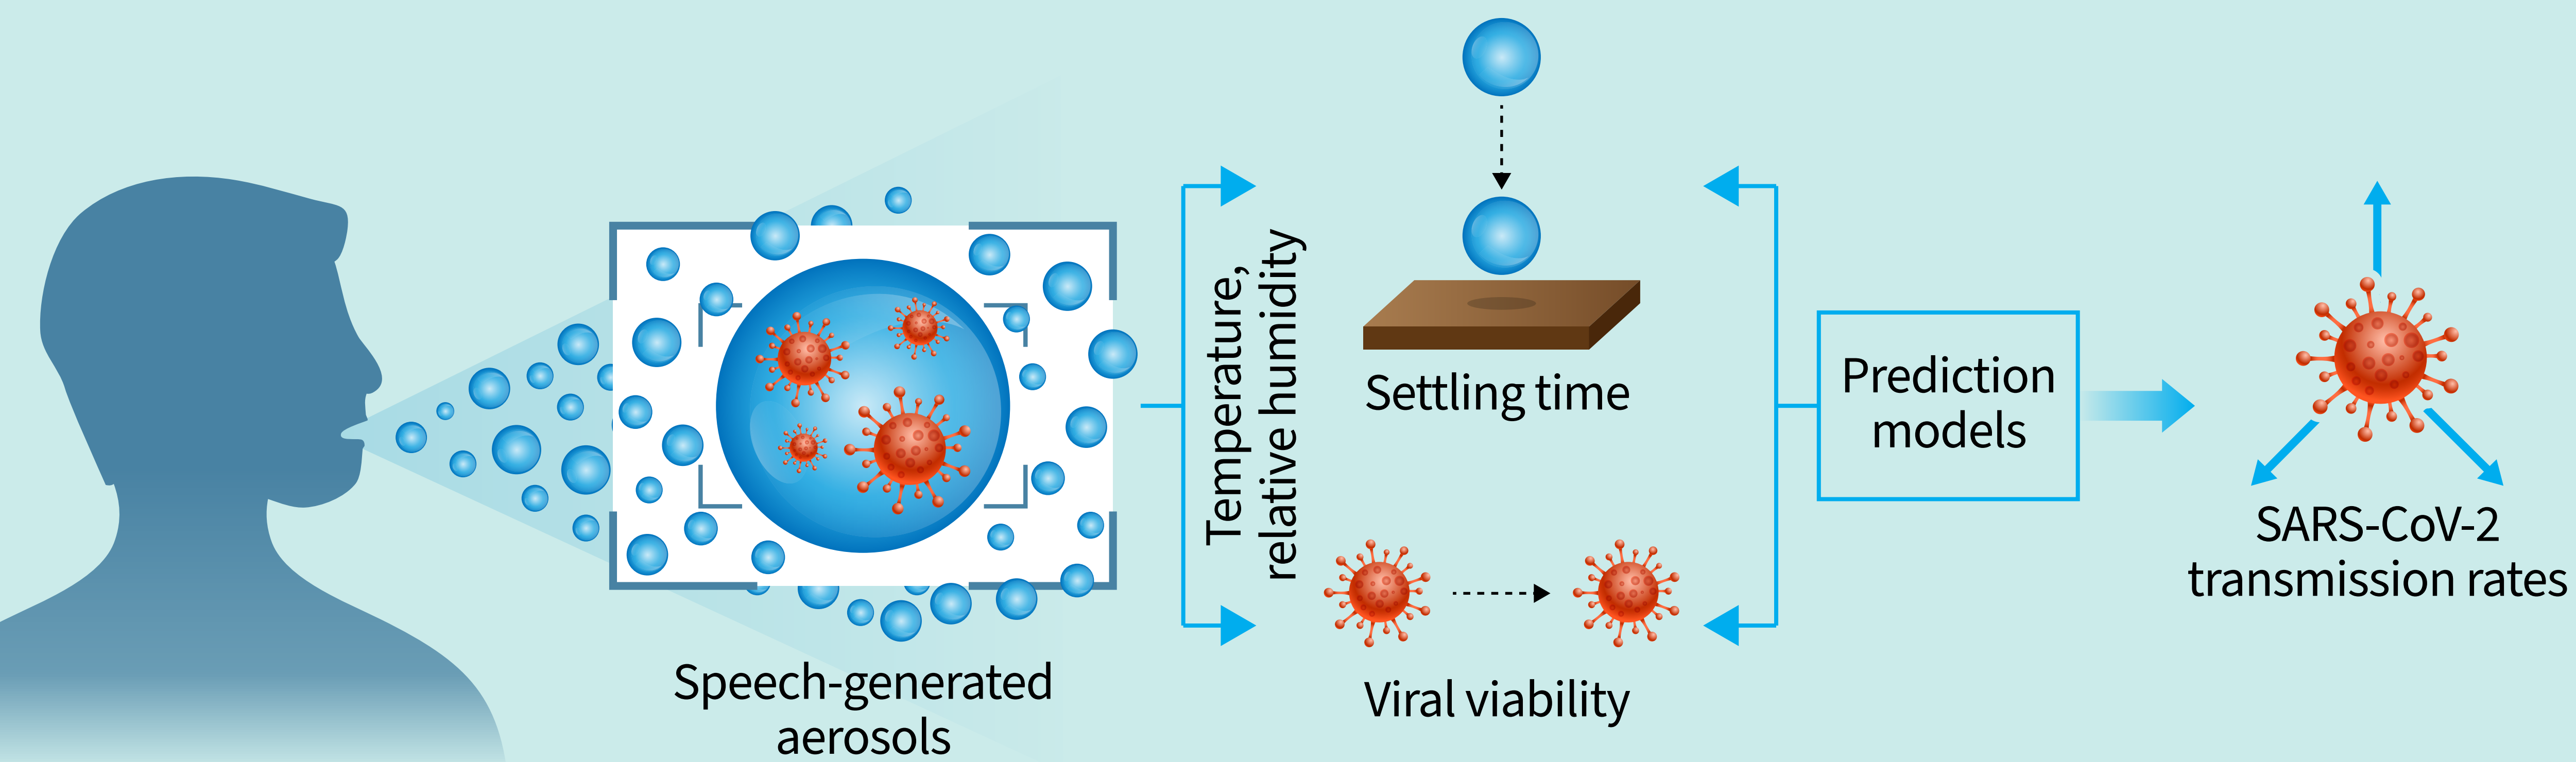

**The predictive ability of weather-influenced aerosol variables validates indirect airborne transmission as an important mechanism for SARS-CoV-2 spread**
